# Supplementary material for: Development of an Optimized Protocol for NMR Metabolomics Studies of Human Colon Cancer Cell Lines and First Insight from Testing of the Protocol Using DNA G-Quadruplex Ligands as Novel Anti-Cancer Drugs
Source: PubMed Central journal article supplement (PMC4812333; doi:10.3390/metabo6010004), 2016-01-15
Supplement: metabolites-06-00004-s001.pdf [file metabolites-06-00004-s001.pdf]

# Supplementary Material: Development of an Optimized Protocol for NMR Metabolomics Studies of Human Colon Cancer Cell Lines and First Insight from Testing of the Protocol Using DNA G-Quadruplex Ligands as Novel Anti-Cancer Drugs

Ilaria Lauri, Francesco Savorani, Nunzia Iaccarino, Pasquale Zizza, Luigi Michele Pavone, Ettore Novellino, Søren Balling Engelsen and Antonio Randazzo

Probing the *Endo*-Metabolome of Human Colon Cancer Cell Lines by NMR Spectroscopy: Testing the Stimuli of DNA G-Quadruplex Ligands as Novel Anti-Cancer Drugs

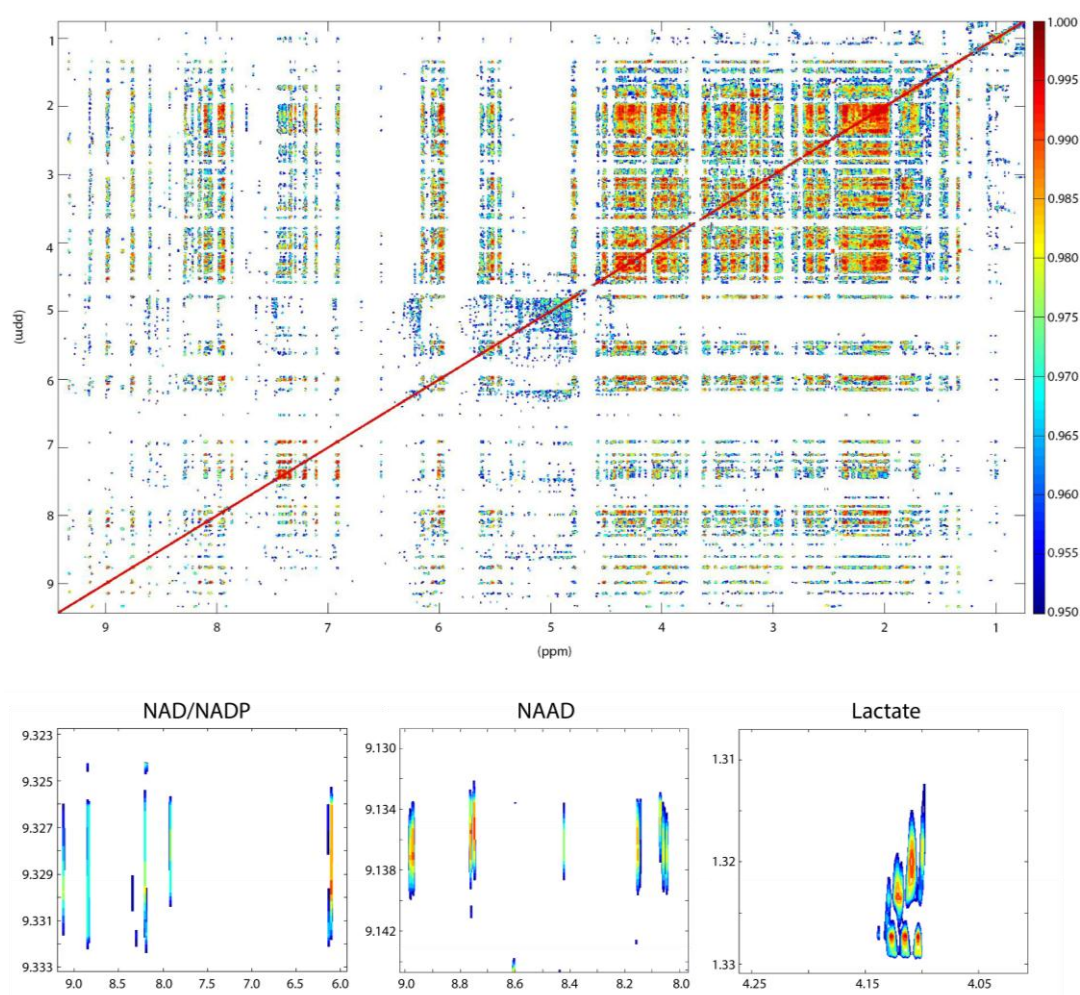

**Figure S1.** (A) Full STOCSY plot colored according to the correlation coefficient (see colored bar on the right); (B–D) Expanded regions of the STOCSY reporting the main correlations for NAD/NADP, NAAD and Lactate, respectively.

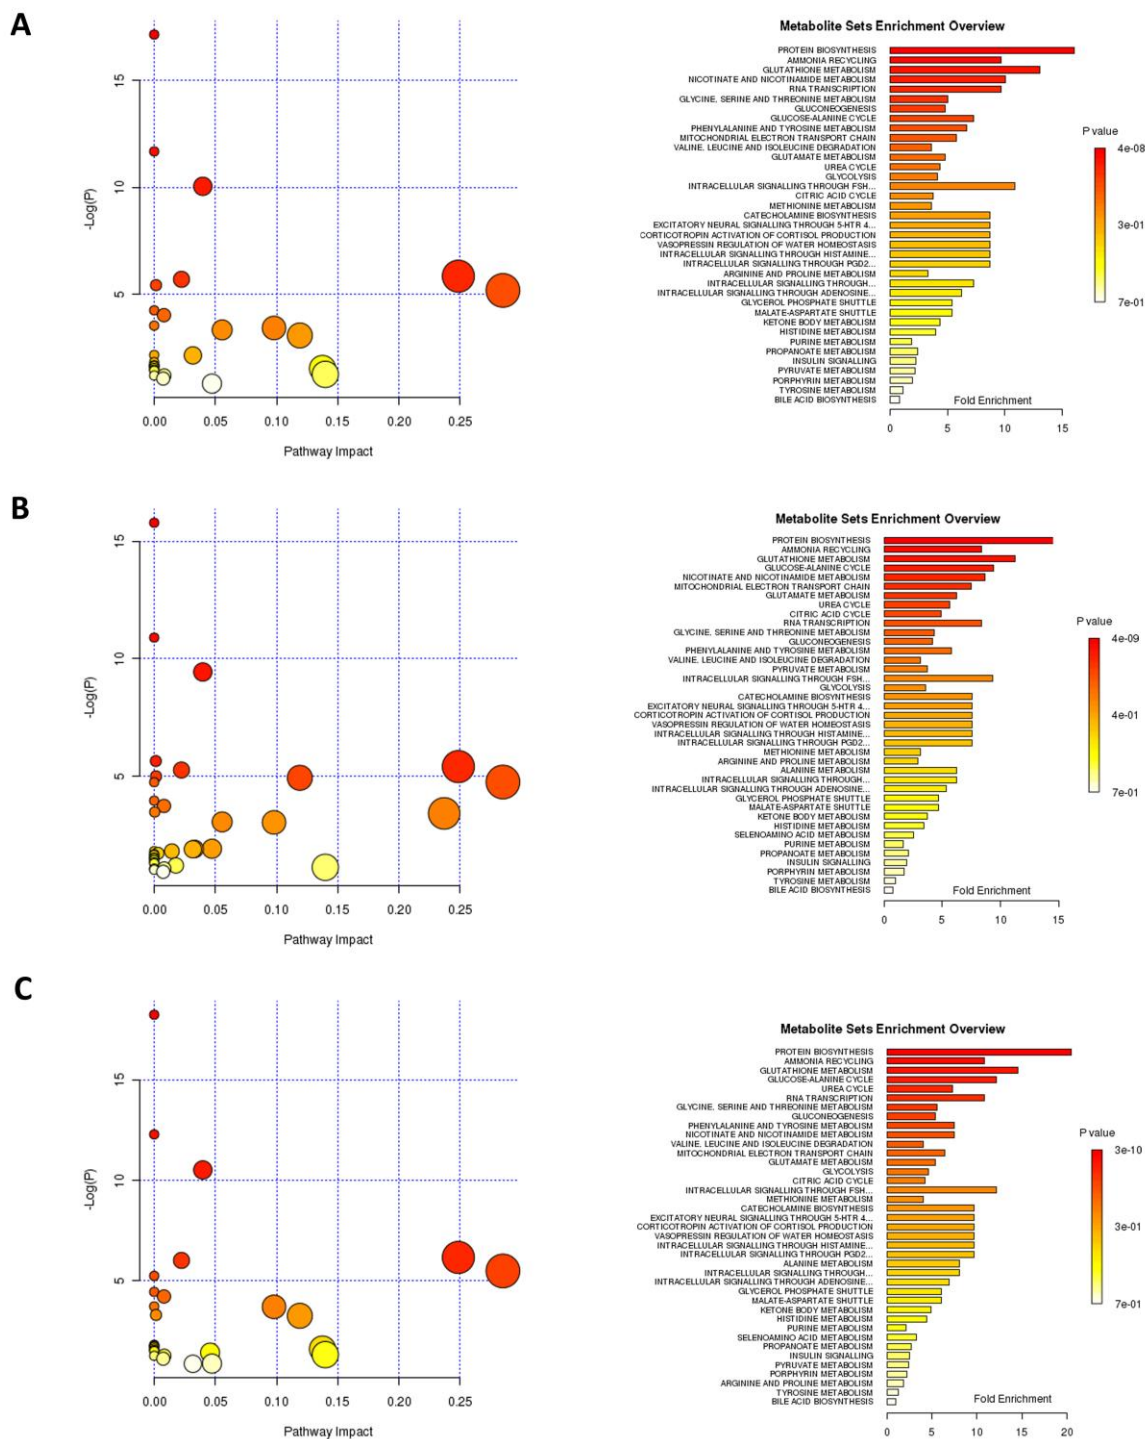

**Figure S2.** Impact of the treatment with compounds 1–3 (panel A–C, respectively) on metabolic pathways of HCT116 cell. Intracellular metabolite-based metabolic pathway analysis and metabolite sets enrichment overview are reported on the left and on the right, respectively.

Table S1. CHEBI codes for the identified metabolites.

| Identification Number | Metabolite                                 | CHEBI Code   |
|-----------------------|--------------------------------------------|--------------|
| 1                     | Lactate                                    | CHEBI:16651  |
| 2                     | Threonine                                  | CHEBI:16857  |
| 3                     | Tyrosine                                   | CHEBI:17895  |
| 4                     | Phenylalanine                              | CHEBI:17295  |
| 5                     | Creatine                                   | CHEBI:16919  |
| 6                     | Creatine phosphate                         | CHEBI:17287  |
| 7                     | Glycine                                    | CHEBI:15428  |
| 8                     | Alanine                                    | CHEBI:16977  |
| 9                     | Acetate                                    | CHEBI:30089  |
| 10                    | Succinate                                  | CHEBI:30031  |
| 11                    | AMP                                        | CHEBI:456215 |
|                       |                                            | CHEBI:17191  |
| 12                    | Isoleucine, Leucine, Valine                | CHEBI:15603  |
|                       |                                            | CHEBI:16414  |
| 13                    | O-Phosphocholine                           | CHEBI:18132  |
| 14                    | Glycerophosphocholine                      | CHEBI:36313  |
| 15                    | Nicotinic acid adenine dinucleotide (NAAD) | CHEBI:75967  |
|                       |                                            | CHEBI:57540  |
| 16                    | NAD <sup>+</sup> /NADP <sup>+</sup>        | CHEBI:58349  |
| 17                    | Histidine                                  | CHEBI:15971  |
| 18                    | Glutathione                                | CHEBI:16856  |
| 19                    | ATP                                        | CHEBI:30616  |
